# Supplementary material for: Perceptions of Digital Device Use and Accompanying Digital Interruptions in Blended Learning
Source: MDPI journal article supplement (doi:10.3390/educsci12030215), 2022-03-17
Supplement: s1 [file s1]

## Excerpt from Survey 1 and Survey 2

| Survey 1                                                                                                                                                                                                                                                                                                                 | Survey 2                                                                                                                                                                                                                                                                                                                 |
|--------------------------------------------------------------------------------------------------------------------------------------------------------------------------------------------------------------------------------------------------------------------------------------------------------------------------|--------------------------------------------------------------------------------------------------------------------------------------------------------------------------------------------------------------------------------------------------------------------------------------------------------------------------|
| Which digital device do you primarily use to log in to Adobe Connect to participate in webinars?                                                                                                                                                                                                                         |                                                                                                                                                                                                                                                                                                                          |
| <ul style="list-style-type: none"> <li>- Desktop computer</li> <li>- Laptop</li> <li>- Tablet</li> <li>- Smartphone</li> <li>- Hybrid device (e.g. laptop with touchscreen)</li> <li>- Other</li> </ul>                                                                                                                  |                                                                                                                                                                                                                                                                                                                          |
| Which digital device do you primarily use during webinars for course-related tasks?                                                                                                                                                                                                                                      | During this on-campus session, which digital device did you primarily use for course-related tasks?                                                                                                                                                                                                                      |
| <ul style="list-style-type: none"> <li>- Desktop computer</li> <li>- Laptop</li> <li>- Tablet</li> <li>- Smartphone</li> <li>- Hybrid device (e.g. laptop with touchscreen)</li> <li>- Other</li> </ul>                                                                                                                  | <ul style="list-style-type: none"> <li>- Laptop</li> <li>- Tablet</li> <li>- Smartphone</li> <li>- Hybrid device (e.g. laptop with touchscreen)</li> <li>- Other</li> </ul>                                                                                                                                              |
| Which digital device do you primarily use during webinars for non-course-related tasks?                                                                                                                                                                                                                                  | During this on-campus session, which digital device did you primarily use for non-course-related tasks?                                                                                                                                                                                                                  |
| <ul style="list-style-type: none"> <li>- Desktop computer</li> <li>- Laptop</li> <li>- Tablet</li> <li>- Smartphone</li> <li>- Hybrid device (e.g. laptop with touchscreen)</li> <li>- Other</li> </ul>                                                                                                                  | <ul style="list-style-type: none"> <li>- Laptop</li> <li>- Tablet</li> <li>- Smartphone</li> <li>- Hybrid device (e.g. laptop with touchscreen)</li> <li>- Other</li> </ul>                                                                                                                                              |
| How do you take notes during webinars?                                                                                                                                                                                                                                                                                   | How did you take notes during this on-campus session?                                                                                                                                                                                                                                                                    |
| <ul style="list-style-type: none"> <li>- With a desktop computer</li> <li>- With a laptop</li> <li>- With a tablet</li> <li>- With a smartphone</li> <li>- With a hybrid device (e.g. laptop with touchscreen)</li> <li>- On paper</li> <li>- I do not take any notes</li> <li>- Other</li> </ul>                        | <ul style="list-style-type: none"> <li>- With a laptop</li> <li>- With a tablet</li> <li>- With a smartphone</li> <li>- With a hybrid device (e.g. laptop with touchscreen)</li> <li>- On paper</li> <li>- I did not take any notes</li> <li>- Other</li> </ul>                                                          |
| During a typical webinar, how much time on average do you spend using your computer ... (typical webinar = 120 minutes)                                                                                                                                                                                                  | During this on-campus session, how much time on average did you spend using your computer ...                                                                                                                                                                                                                            |
| <ul style="list-style-type: none"> <li>- to check social media (e.g. Facebook, Twitter, Instagram, etc.)? minutes</li> <li>- to read or write e-mails? minutes</li> <li>- to text? minutes</li> <li>- to shop online? minutes</li> <li>- to read the news? minutes</li> <li>- to check sports scores? minutes</li> </ul> | <ul style="list-style-type: none"> <li>- to check social media (e.g. Facebook, Twitter, Instagram, etc.)? minutes</li> <li>- to read or write e-mails? minutes</li> <li>- to text? minutes</li> <li>- to shop online? minutes</li> <li>- to read the news? minutes</li> <li>- to check sports scores? minutes</li> </ul> |

|                                                                                                                                                                                                                                                                                                                                                                                                                                                                                                           |                                                                                                                                                                                                                                                                                                                                                                                                                                                                                                                      |
|-----------------------------------------------------------------------------------------------------------------------------------------------------------------------------------------------------------------------------------------------------------------------------------------------------------------------------------------------------------------------------------------------------------------------------------------------------------------------------------------------------------|----------------------------------------------------------------------------------------------------------------------------------------------------------------------------------------------------------------------------------------------------------------------------------------------------------------------------------------------------------------------------------------------------------------------------------------------------------------------------------------------------------------------|
| <ul style="list-style-type: none"> <li>- to watch videos (e.g. Netflix, YouTube, etc.)? minutes</li> <li>- to play games? minutes</li> <li>- for other activities?</li> </ul>                                                                                                                                                                                                                                                                                                                             | <ul style="list-style-type: none"> <li>- to watch videos (e.g. Netflix, YouTube, etc.)? minutes</li> <li>- to play games? minutes</li> <li>- for other activities?</li> </ul>                                                                                                                                                                                                                                                                                                                                        |
| On average, what percentage of webinar time do you use your computer for non-course-related purposes?                                                                                                                                                                                                                                                                                                                                                                                                     | What percentage of this on-campus session did you use your computer for non-course-related purposes in total?                                                                                                                                                                                                                                                                                                                                                                                                        |
| What are reasons for spending time on non-course-related activities during a webinar?                                                                                                                                                                                                                                                                                                                                                                                                                     | What are reasons for spending time on non-course-related activities during an on-campus session?                                                                                                                                                                                                                                                                                                                                                                                                                     |
| Are there any aspects of the classroom experience or the behavior of fellow students that prevent you from paying attention to webinars?                                                                                                                                                                                                                                                                                                                                                                  | Are there any aspects of the classroom experience or the behavior of fellow students that prevent you from paying attention to the lecture?                                                                                                                                                                                                                                                                                                                                                                          |
| When you use your computer for non-course-related activities during a webinar, how do you think it affects your learning? <ul style="list-style-type: none"> <li>- It strongly helps my learning of course material</li> <li>- It somewhat helps my learning of course material</li> <li>- It makes no difference to my learning of course material</li> <li>- It somewhat disrupts my learning of course material</li> <li>- It strongly disrupts my learning of course material</li> </ul>              | When you use your computer for non-course-related activities during an on-campus session, how do you think it affects your learning? <ul style="list-style-type: none"> <li>- It strongly helps my learning of course material</li> <li>- It somewhat helps my learning of course material</li> <li>- It makes no difference to my learning of course material</li> <li>- It somewhat disrupts my learning of course material</li> <li>- It strongly disrupts my learning of course material</li> </ul>              |
| When other students use their computers for non-course-related activities during a webinar, how do you think it affects your learning? <ul style="list-style-type: none"> <li>- It strongly helps my learning of course material</li> <li>- It somewhat helps my learning of course material</li> <li>- It makes no difference to my learning of course material</li> <li>- It somewhat disrupts my learning of course material</li> <li>- It strongly disrupts my learning of course material</li> </ul> | When other students use their computers for non-course-related activities during an on-campus session, how do you think it affects your learning? <ul style="list-style-type: none"> <li>- It strongly helps my learning of course material</li> <li>- It somewhat helps my learning of course material</li> <li>- It makes no difference to my learning of course material</li> <li>- It somewhat disrupts my learning of course material</li> <li>- It strongly disrupts my learning of course material</li> </ul> |
