# Supplementary material for: Perceptions of Digital Device Use and Accompanying Digital Interruptions in Blended Learning
Source: MDPI journal article supplement (doi:10.3390/educsci12030215), 2022-03-17
Supplement: s1 [file s1]

## Final Coding Scheme

Question: What are reasons for spending time on non-course-related activities during a webinar?

| Category                       | Subcategory                       |
|--------------------------------|-----------------------------------|
| Interaction within cohort      | Course-related communication      |
|                                | Non-course-related communication  |
|                                | Communication about other courses |
|                                | Social aspects                    |
| Concentration difficulties     | Feeling of stress                 |
|                                | Need for breaks                   |
|                                | Open to distractions              |
|                                | Time constraints                  |
|                                | Tiredness                         |
| Course content-related reasons | Cannot follow the topic           |
|                                | Gain better understanding         |
|                                | Not interested in content         |
|                                | Pre-knowledge                     |
|                                | Questions from peers              |
|                                | Quick completion of tasks         |
| External interruption          | Emergencies                       |
|                                | Calls                             |
|                                | Family                            |
|                                | General                           |
|                                | Reading/Replying to messages      |
|                                | People                            |
|                                | Work                              |
| Internal interruption          | Being online                      |
|                                | Family                            |
|                                | Keeping in touch                  |
|                                | Personal interests                |
|                                | Planning                          |
|                                | Prioritization                    |
|                                | Social media                      |
|                                | Reading/Replying to messages      |
|                                | Sudden thoughts/ideas             |
| Physical needs                 | Physical needs                    |
| Planned break                  | Planned break                     |
| Teaching style                 | Lack of focus                     |
|                                | Quality of materials              |
|                                | Lack of motivation from lecturer  |
|                                | Student expectations              |
|                                | Presentation style                |
| Technical difficulties         | Internet connection               |
