# Supplementary material for: Perceptions of Digital Device Use and Accompanying Digital Interruptions in Blended Learning
Source: MDPI journal article supplement (doi:10.3390/educsci12030215), 2022-03-17
Supplement: s1 [file s1]

### First Draft of Coding Scheme

Question: What are reasons for spending time on non-course-related activities during a webinar?

| Category                       | Subcategory                                                                                         |
|--------------------------------|-----------------------------------------------------------------------------------------------------|
| Cannot follow the topic        |                                                                                                     |
| Concentration difficulties     | Tiredness<br>Need for breaks<br>Open to distractions<br>Hunger                                      |
| Course content-related reasons | Quick mastery of content<br>Not interested in content<br>Pre-knowledge                              |
| External interruption          | General interruption<br>Family & Friends<br>Work<br>Messages                                        |
| Other study-related reasons    | Communication with cohort<br>Communication during webinar<br>Planning                               |
| Internal interruption          |                                                                                                     |
| Social aspects                 |                                                                                                     |
| Teaching style                 | Lack of focus<br>Quality of materials<br>Amount of input<br>Lack of structure<br>Presentation style |
| Technical problems             |                                                                                                     |
| Time                           |                                                                                                     |
